# Supplementary material for: In epithelial cancers, aberrant COL17A1 promoter methylation predicts its misexpression and increased invasion
Source: PubMed Central journal article supplement (PMC5116176; doi:10.1186/s13148-016-0290-6), 2016-11-18
Supplement: 13148_2016_290_MOESM1_ESM.pdf [file 13148_2016_290_MOESM1_ESM.pdf]

## Additional File 1: Supplementary Material

Table S1. Prognostic strength of misexpression of collagen genes in breast cancer

| Gene <sup>a</sup> | No. of patients | HR (95% CI)      | Prognostic strength p value | Adjuvant! Online <sup>b</sup> p value | Nottingham index <sup>b</sup> p value | Survival <sup>c</sup> p value |
|-------------------|-----------------|------------------|-----------------------------|---------------------------------------|---------------------------------------|-------------------------------|
| COL1A1            | 4176            | 1.04 (0.97-1.11) | 0.2570                      | 0.0895                                | 0.0040                                | 0.8796                        |
| COL1A2            | 4078            | 1.09 (1.02-1.16) | 0.0086                      | 0.0058                                | 9.01x10 <sup>-5</sup>                 | 0.6404                        |
| COL2A1            | 4077            | 1.04 (0.98-1.11) | 0.2190                      | 0.4464                                | 0.2961                                | 0.3380                        |
| COL3A1            | 3906            | 1.04 (0.98-1.11) | 0.2190                      | 0.0008                                | 0.0001                                | 0.4317                        |
| <b>COL4A1</b>     | 3925            | 1.25 (1.17-1.34) | 3.03x10 <sup>-10</sup>      | 3.94x10 <sup>-6</sup>                 | 0.0003                                | 1.71x10 <sup>-5</sup>         |
| <b>COL4A2</b>     | 4177            | 1.18 (1.11-1.25) | 8.11x10 <sup>-10</sup>      | 0.0001                                | 0.0018                                | 0.0098                        |
| COL4A3            | 3609            | 0.91 (0.82-1.02) | 0.0900                      | 0.0009                                | 0.0058                                | 0.2711                        |
| COL4A4            | 3826            | 1.00 (0.93-1.07) | 1.000                       | 0.0161                                | 0.0132                                | 0.7605                        |
| COL4A5            | 3826            | 0.86 (0.81-0.92) | 4.57x10 <sup>-6</sup>       | 0.0883                                | 0.5144                                | 0.0005                        |
| COL4A6            | 3825            | 0.93 (0.86-1.00) | 0.0589                      | 0.9200                                | 0.4696                                | 0.0057                        |
| COL5A1            | 4003            | 1.09 (1.02-1.16) | 0.0086                      | 0.0237                                | 0.0006                                | 0.1034                        |
| COL5A2            | 4078            | 1.08 (1.02-1.15) | 0.0119                      | 0.0130                                | 0.0005                                | 0.0925                        |
| COL5A3            | 3751            | 1.10 (1.03-1.17) | 0.0034                      | 0.0103                                | 0.0002                                | 0.2255                        |
| COL6A1            | 4127            | 1.02 (0.95-1.11) | 0.6306                      | 0.0741                                | 0.0048                                | 0.3263                        |
| COL6A2            | 3629            | 1.03 (0.97-1.11) | 0.3971                      | 0.0029                                | 0.0067                                | 0.4538                        |
| COL6A3            | 4177            | 1.05 (0.99-1.11) | 0.0943                      | 0.0790                                | 0.0015                                | 0.3380                        |
| COL6A5            | 1052            | 0.99 (0.86-1.13) | 0.8939                      | 0.5248                                | 0.4144                                | 0.4041                        |
| COL6A6            | 1545            | 0.80 (0.72-0.89) | 4.35x10 <sup>-5</sup>       | 0.1516                                | 0.1017                                | 0.0010                        |
| COL7A1            | 3826            | 0.98 (0.91-1.05) | 0.5920                      | 0.5818                                | 0.7821                                | 0.7643                        |
| COL8A1            | 4078            | 1.04 (0.96-1.12) | 0.3234                      | 0.0383                                | 0.0094                                | 0.6404                        |
| COL8A2            | 3300            | 0.92 (0.86-0.99) | 0.0201                      | 0.9071                                | 0.6913                                | 0.2481                        |
| COL9A1            | 3826            | 1.07 (1.01-1.14) | 0.0282                      | 0.2339                                | 0.0925                                | 0.1282                        |
| COL9A2            | 3924            | 0.96 (0.90-1.02) | 0.2026                      | 0.3135                                | 0.2763                                | 0.3450                        |
| COL9A3            | 3925            | 1.02 (0.95-1.08) | 0.5563                      | 0.3450                                | 0.1699                                | 0.8796                        |
| COL10A1           | 3826            | 1.07 (1.01-1.15) | 0.0407                      | 0.0033                                | 0.0021                                | 0.0618                        |
| COL11A1           | 3826            | 1.13 (1.06-1.21) | 0.0003                      | 0.0869                                | 0.1058                                | 0.0415                        |
| COL11A2           | 3598            | 0.99 (0.91-1.07) | 0.8195                      | 0.6644                                | 0.9105                                | 0.2711                        |
| COL12A1           | 2269            | 1.05 (0.96-1.15) | 0.2935                      | 0.6181                                | 0.2259                                | 0.7199                        |
| COL13A1           | 2939            | 1.15 (1.04-1.27) | 0.0061                      | 0.4412                                | 0.8771                                | 0.0119                        |
| COL14A1           | 3709            | 0.90 (0.84-0.97) | 0.0041                      | 0.0594                                | 0.1841                                | 0.0015                        |
| COL15A1           | 3826            | 1.05 (0.99-1.12) | 0.1211                      | 0.0077                                | 0.0283                                | 0.6577                        |
| COL16A1           | 4176            | 0.94 (0.89-1.00) | 0.0371                      | 0.6270                                | 0.3151                                | 0.0522                        |
| <b>COL17A1</b>    | 3925            | 0.86 (0.81-0.92) | 4.57x10 <sup>-6</sup>       | 0.0184                                | 0.0434                                | 0.0001                        |
| COL18A1           | 4127            | 1.08 (1.01-1.15) | 0.0200                      | 0.2976                                | 0.0688                                | 0.0355                        |
| COL19A1           | 3825            | 1.04 (0.98-1.11) | 0.2190                      | 0.3336                                | 0.5479                                | 0.1034                        |
| COL20A1           | 1915            | 1.00 (0.91-1.10) | 1.000                       | 0.1205                                | 0.1547                                | 0.3942                        |
| COL21A1           | 3923            | 0.97 (0.91-1.03) | 0.3404                      | 0.1376                                | 0.0434                                | 0.5144                        |
| COL22A1           | 1466            | 1.09 (0.97-1.24) | 0.1697                      | 0.7976                                | 0.8749                                | 0.0852                        |
| COL23A1           | 1967            | 0.97 (0.89-1.06) | 0.5047                      | 0.0486                                | 0.0194                                | 0.1979                        |
| COL24A1           | 1812            | 0.99 (0.91-1.09) | 0.8383                      | 0.8666                                | 0.8134                                | 0.8410                        |
| COL25A1           | 1722            | 1.01 (0.90-1.13) | 0.8736                      | 0.4467                                | 0.2265                                | 0.7004                        |
| COL26A1           | 1079            | 1.15 (0.96-1.37) | 0.1235                      | 0.7371                                | 0.0790                                | 0.8285                        |
| COL27A1           | 1722            | 0.85 (0.75-0.95) | 0.0071                      | 0.1076                                | 0.1076                                | 0.0061                        |
| COL28A1           | 1425            | 0.90 (0.79-1.03) | 0.1195                      | 0.2894                                | 0.2709                                | 0.8586                        |

<sup>a</sup> Bold-faced genes pass all four tests with  $p < 0.05$ .

<sup>b</sup> Calculated as described in [1] and [2], respectively.

<sup>c</sup> Distant metastasis-free survival with patients split in low and high expression groups using the median expression level as the cut-off, as described [3]. P values based on log-rank Mantel-Cox tests.

| <b>Table S2. Clinicopathological features of the breast cancer patients analyzed by immunohistochemistry</b> |                               |                       |
|--------------------------------------------------------------------------------------------------------------|-------------------------------|-----------------------|
| <b>Clinicopathological variable</b>                                                                          | <b>Number of patients (%)</b> | <b>Median (Range)</b> |
| Gender                                                                                                       |                               |                       |
| Male                                                                                                         | 0 (0)                         |                       |
| Female                                                                                                       | 150 (100)                     |                       |
| Age                                                                                                          |                               |                       |
| <48                                                                                                          | 71 (47)                       | 48 (27-75)            |
| 48-54                                                                                                        | 37 (25)                       |                       |
| >54                                                                                                          | 42 (28)                       |                       |
| Pathology                                                                                                    |                               |                       |
| Ductal carcinoma                                                                                             | 150 (100)                     |                       |
| Grade                                                                                                        |                               |                       |
| 1                                                                                                            | 3 (2)                         |                       |
| 2                                                                                                            | 102 (68)                      |                       |
| 3                                                                                                            | 10 (7)                        |                       |
| Stage                                                                                                        |                               |                       |
| I                                                                                                            | 6 (4)                         |                       |
| II                                                                                                           | 105 (70)                      |                       |
| III                                                                                                          | 33 (22)                       |                       |
| IV                                                                                                           | 6 (4)                         |                       |
| Tumor invasion                                                                                               |                               |                       |
| T1                                                                                                           | 8 (5)                         |                       |
| T2                                                                                                           | 89 (59)                       |                       |
| T3                                                                                                           | 28 (19)                       |                       |
| T4                                                                                                           | 25 (17)                       |                       |
| Nodal status                                                                                                 |                               |                       |
| N0                                                                                                           | 98 (65)                       |                       |
| N1                                                                                                           | 38 (25)                       |                       |
| N2                                                                                                           | 12 (8)                        |                       |
| N3                                                                                                           | 2 (1)                         |                       |
| Metastasis                                                                                                   |                               |                       |
| M0                                                                                                           | 146 (97)                      |                       |
| M1                                                                                                           | 4 (3)                         |                       |
| Estrogen receptor status                                                                                     |                               |                       |
| ER+                                                                                                          | 63 (42)                       |                       |
| ER-                                                                                                          | 78 (52)                       |                       |
| Progesterone receptor status                                                                                 |                               |                       |
| PR+                                                                                                          | 44 (29)                       |                       |
| PR-                                                                                                          | 96 (64)                       |                       |
| HER2 status                                                                                                  |                               |                       |
| HER2-                                                                                                        | 32 (21)                       |                       |
| HER2+                                                                                                        | 108 (72)                      |                       |

**Table S3. Clinicopathological features of the cervical cancer patients analyzed by immunohistochemistry**

| Clinicopathological variable | Number of patients (%) | Median (Range) |
|------------------------------|------------------------|----------------|
| Gender                       |                        |                |
| Male                         | 0 (0)                  |                |
| Female                       | 361 (100)              |                |
| Age                          |                        |                |
| <48                          | 199 (55)               | 46 (25-78)     |
| 48-54                        | 94 (26)                |                |
| >54                          | 68 (19)                |                |
| Pathology                    |                        |                |
| Squamous cell carcinoma      | 331 (92)               |                |
| Adenocarcinoma               | 27 (7)                 |                |
| Adenosquamous carcinoma      | 3 (1)                  |                |
| Grade                        |                        |                |
| 1                            | 56 (16)                |                |
| 2                            | 208 (58)               |                |
| 2-3                          | 8 (2)                  |                |
| 3                            | 78 (22)                |                |
| Stage                        |                        |                |
| I                            | 151 (42)               |                |
| II                           | 34 (9)                 |                |
| III                          | 4 (1)                  |                |
| IV                           | 1 (0.3)                |                |
| Tumor invasion               |                        |                |
| T1                           | 240 (66)               |                |
| T2                           | 103 (29)               |                |
| T3                           | 10 (3)                 |                |
| T4                           | 0 (0)                  |                |
| Nodal status                 |                        |                |
| N0                           | 320 (89)               |                |
| N1                           | 35 (10)                |                |
| N2                           | 0 (0)                  |                |
| N3                           | 0 (0)                  |                |
| Metastasis                   |                        |                |
| M0                           | 355 (98)               |                |
| M1                           | 2 (0.6)                |                |

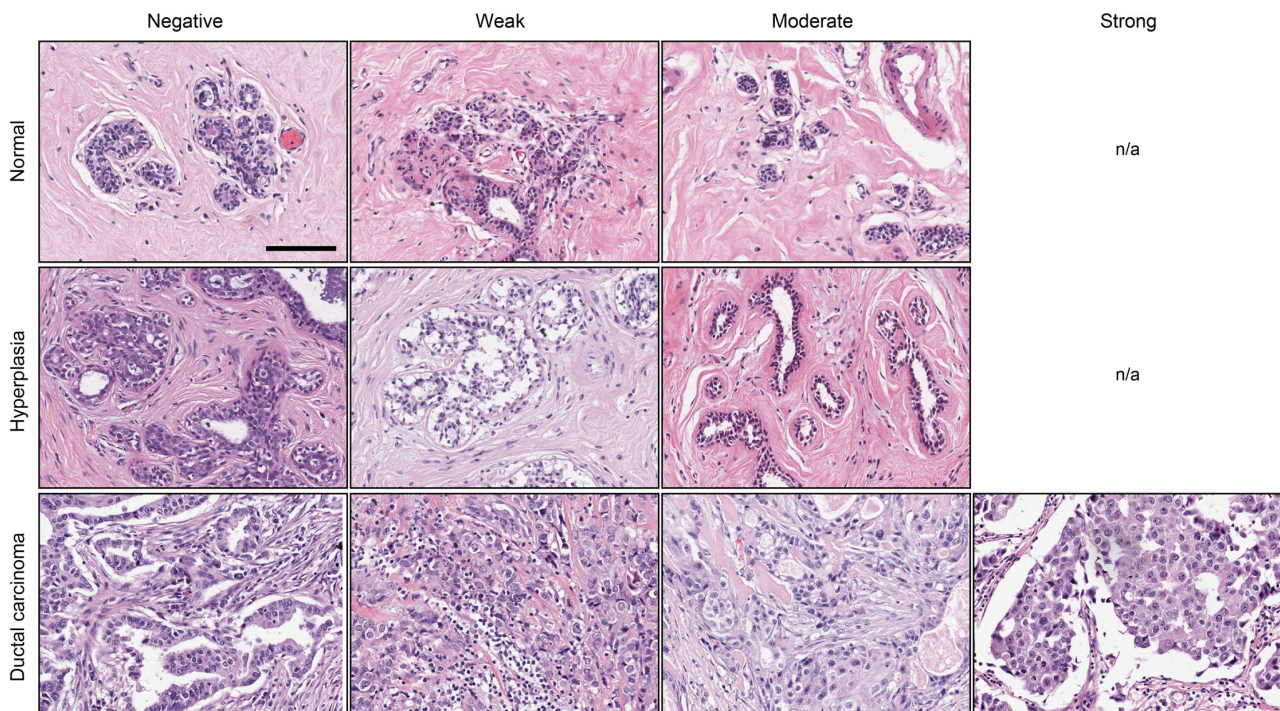**Figure S1.**

H&E stained sections of corresponding samples shown in Figure 2. Scale bar, 100 $\mu$ m.

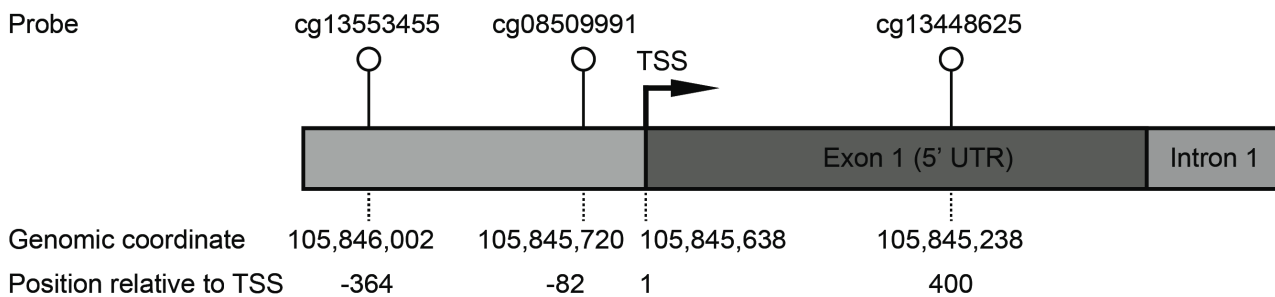**Figure S2. Schematic of the promoter and 5' end of the *COL17A1* gene.**

The locations of the TCGA Illumina Infinium HumanMethylation450 probes, exon 1 and intron 1 are indicated relative to the transcription start site (TSS). The genomic coordinates correspond to the base pair numbers on chromosome 10, according to human reference genome hg19.

### Supplementary References

1. Ravdin PM, Siminoff LA, Davis GJ, Mercer MB, Hewlett J, Gerson N, Parker HL. Computer program to assist in making decisions about adjuvant therapy for women with early breast cancer. *J Clin Oncol*. 2001; 19:980-91.
2. Galea MH, Blamey RW, Elston CE, Ellis IO. The Nottingham Prognostic Index in primary breast cancer. *Breast Cancer Res Treat*. 1992; 22:207-19.
3. Vaidyanathan S, Thangavelu PU, Duijf PH. Overexpression of Ran GTPase components regulating nuclear export, but not mitotic spindle assembly, marks chromosome instability and poor prognosis in breast cancer. *Target Oncol*. 2016; 11:677-86.
